# Supplementary material
Source: bioRxiv or medRxiv preprint supplement (https://www.biorxiv.org/highwire/filestream/97943/field_highwire_adjunct_files/9/299651-4.pdf)

**Yr5 protein**

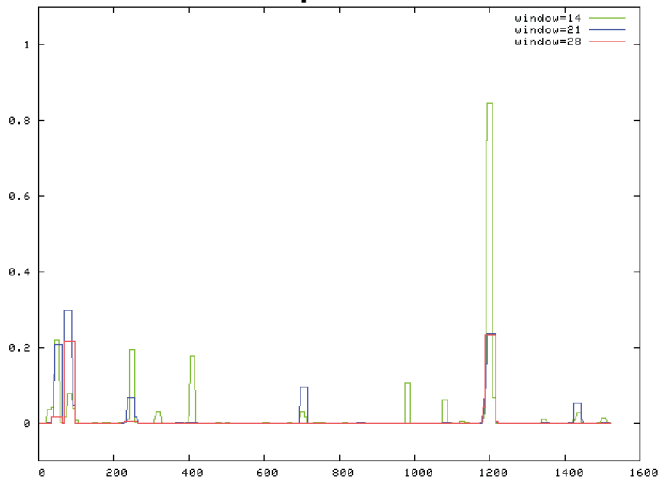

**Sr33 protein**

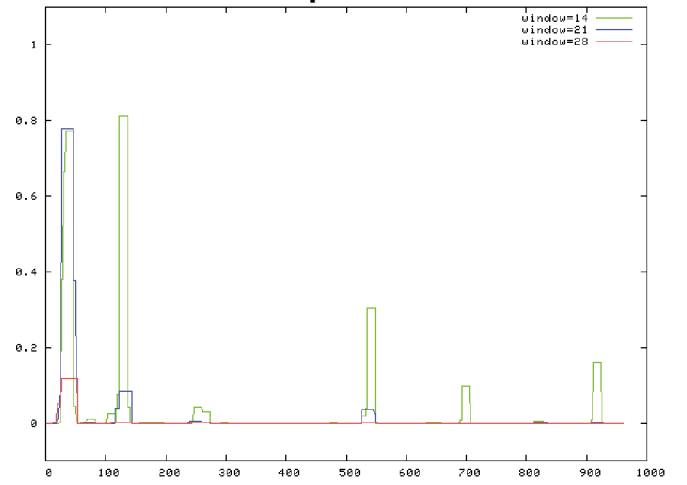

**Yr5 protein without BED domain**

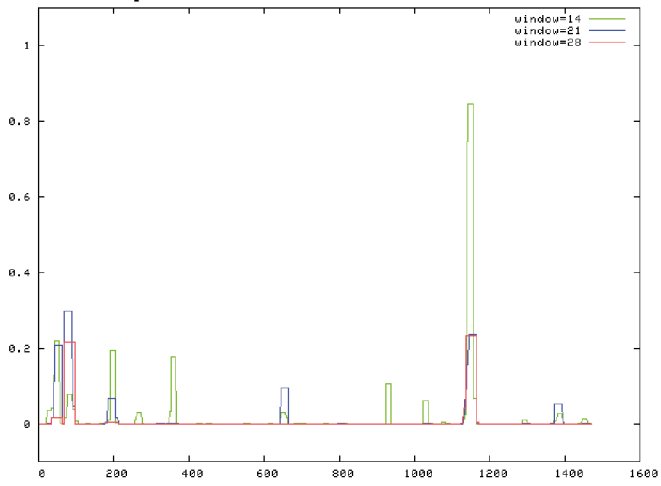

**Mla10 protein**

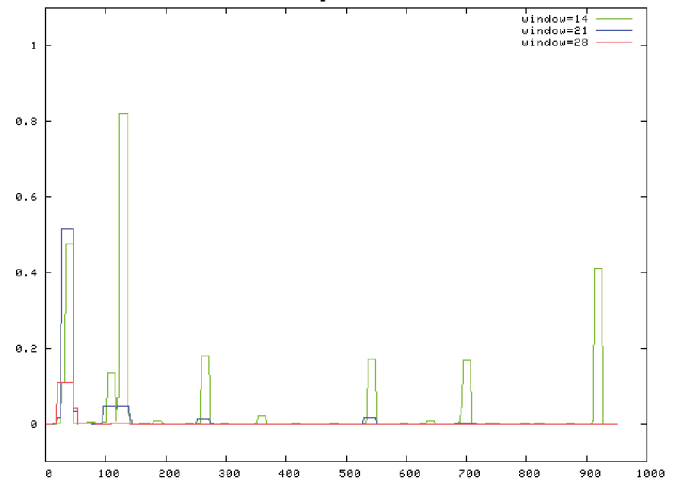

**Yr7 protein**

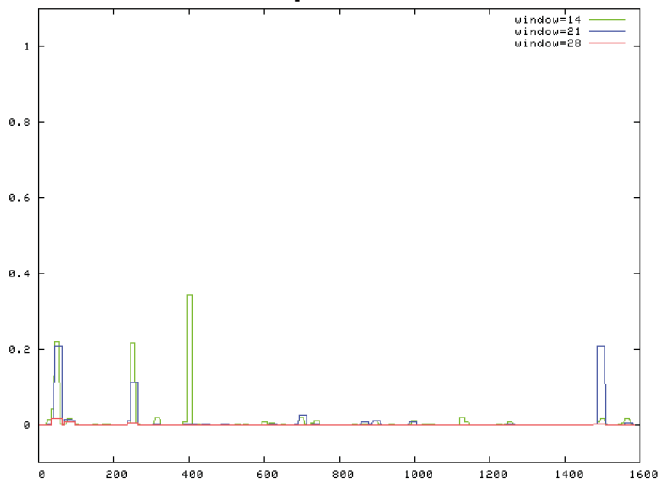

**Pm3 protein**

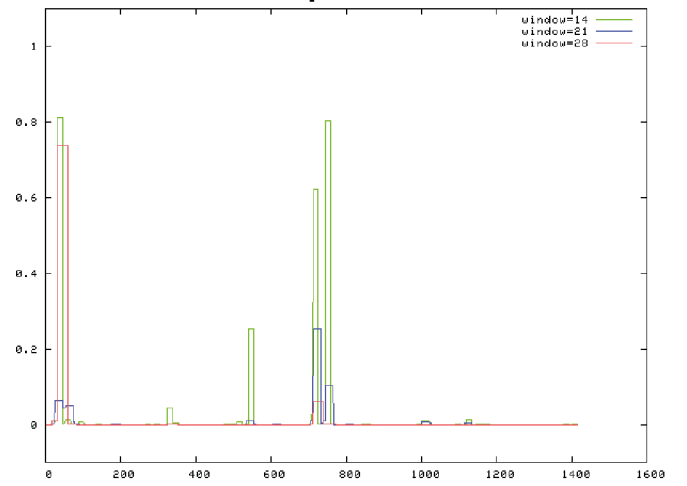

**Yr7 protein without BED domain**

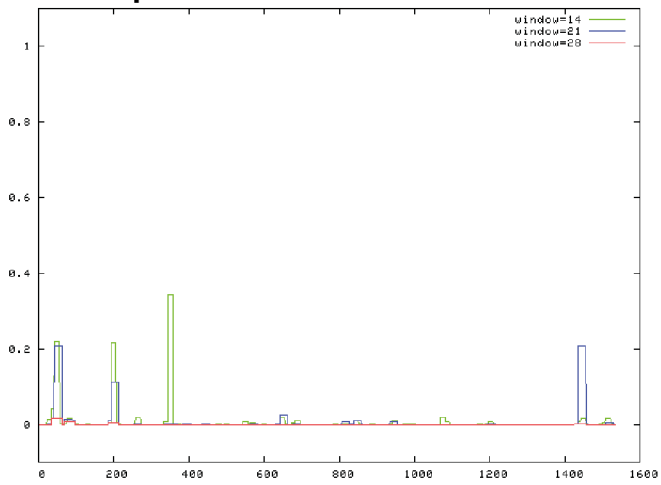

**RPS5 protein**

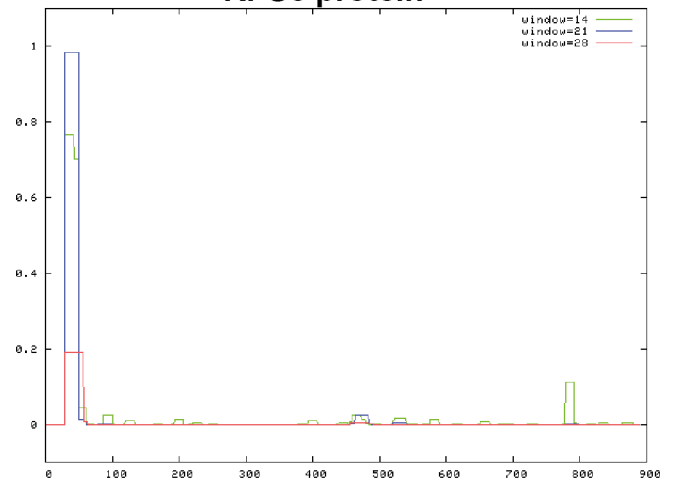

Supplement: Supplementary file [file 299651-4.pdf]
